# Supplementary material for: Delivery of long-term-injectable agents for TB by lay carers: pragmatic randomised trial
Source: PubMed Central journal article supplement (PMC6929921; doi:10.1136/thoraxjnl-2018-212675), 2019-11-01
Supplement: thoraxjnl-2018-212675supp001.pdf [file thoraxjnl-2018-212675supp001.pdf]

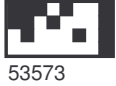

Form RROC\_F1 First Competency Test

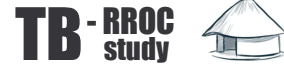

Study ID  
F101

Write barcode number here

|  |  |  |  |  |  |  |
|--|--|--|--|--|--|--|
|  |  |  |  |  |  |  |
|--|--|--|--|--|--|--|

Interviewer check the box if this page has any corrections

| Assessment |       |                                                                 |                                                                  |
|------------|-------|-----------------------------------------------------------------|------------------------------------------------------------------|
| F102       | DRAW  | Draws up sterile water into syringe                             | Yes <input type="checkbox"/> (1) No <input type="checkbox"/> (2) |
| F103       | RECON | Correctly reconstitutes antibiotic in vial                      | Yes <input type="checkbox"/> (1) No <input type="checkbox"/> (2) |
| F104       | WDRAW | Withdraws correct amount of antibiotic into syringe             | Yes <input type="checkbox"/> (1) No <input type="checkbox"/> (2) |
| F105       | CHANG | Changes needle before performing injection                      | Yes <input type="checkbox"/> (1) No <input type="checkbox"/> (2) |
| F106       | BUTT  | Correctly locates safe injection site                           | Yes <input type="checkbox"/> (1) No <input type="checkbox"/> (2) |
| F107       | CLEAN | Cleans the skin                                                 | Yes <input type="checkbox"/> (1) No <input type="checkbox"/> (2) |
| F108       | ADVAN | Correctly advances needle into muscle perpendicular to skin     | Yes <input type="checkbox"/> (1) No <input type="checkbox"/> (2) |
| F109       | FLASH | Withdraws to check for flashback of blood                       | Yes <input type="checkbox"/> (1) No <input type="checkbox"/> (2) |
| F110       | ADMIN | Administers contents of syringe                                 | Yes <input type="checkbox"/> (1) No <input type="checkbox"/> (2) |
| F111       | SAFE  | Washes hands, wears gloves and disposes of all materials safely | Yes <input type="checkbox"/> (1) No <input type="checkbox"/> (2) |

| Competency |      |                                                                                                                                       |                                                                  |
|------------|------|---------------------------------------------------------------------------------------------------------------------------------------|------------------------------------------------------------------|
| F112       | COMP | Is the guardian competent to safely administer intramuscular streptomycin?<br><br><i>(to be competent, guardian must score 10/10)</i> | Yes <input type="checkbox"/> (1) No <input type="checkbox"/> (2) |

| Knowledge of side effects |      |                                                                                        |                                                                                                                                                                   |
|---------------------------|------|----------------------------------------------------------------------------------------|-------------------------------------------------------------------------------------------------------------------------------------------------------------------|
| F113                      | KNOW | Is the guardian competent to recall possible complications of streptomycin injections? | Infection at the place of injection <input type="checkbox"/> (1)<br>Leg going weak <input type="checkbox"/> (2)<br>Not passing urine <input type="checkbox"/> (3) |

| Form completion      |                                                                                                                                                                                                                        |   |   |   |                             |                                                                                                                                                                                                                                                                                                                                                                                                                                                                                                                                                                                                                                                                           |   |   |  |  |  |  |  |  |  |  |   |   |   |   |   |   |   |   |   |  |
|----------------------|------------------------------------------------------------------------------------------------------------------------------------------------------------------------------------------------------------------------|---|---|---|-----------------------------|---------------------------------------------------------------------------------------------------------------------------------------------------------------------------------------------------------------------------------------------------------------------------------------------------------------------------------------------------------------------------------------------------------------------------------------------------------------------------------------------------------------------------------------------------------------------------------------------------------------------------------------------------------------------------|---|---|--|--|--|--|--|--|--|--|---|---|---|---|---|---|---|---|---|--|
| Staff ID<br>F114 IID | <table border="1" style="width: 100%; text-align: center;"> <tr> <td style="width: 20px; height: 20px;"></td> <td style="width: 20px; height: 20px;"></td> <td style="width: 20px; height: 20px;"></td> </tr> </table> |   |   |   | Date completed<br>F115 DCOM | <table border="1" style="width: 100%; text-align: center;"> <tr> <td style="width: 20px; height: 20px;"></td> </tr> <tr> <td>D</td> <td>D</td> <td>M</td> <td>O</td> <td>N</td> <td>Y</td> <td>Y</td> <td>Y</td> <td>Y</td> <td></td> </tr> </table> |   |   |  |  |  |  |  |  |  |  | D | D | M | O | N | Y | Y | Y | Y |  |
|                      |                                                                                                                                                                                                                        |   |   |   |                             |                                                                                                                                                                                                                                                                                                                                                                                                                                                                                                                                                                                                                                                                           |   |   |  |  |  |  |  |  |  |  |   |   |   |   |   |   |   |   |   |  |
|                      |                                                                                                                                                                                                                        |   |   |   |                             |                                                                                                                                                                                                                                                                                                                                                                                                                                                                                                                                                                                                                                                                           |   |   |  |  |  |  |  |  |  |  |   |   |   |   |   |   |   |   |   |  |
| D                    | D                                                                                                                                                                                                                      | M | O | N | Y                           | Y                                                                                                                                                                                                                                                                                                                                                                                                                                                                                                                                                                                                                                                                         | Y | Y |  |  |  |  |  |  |  |  |   |   |   |   |   |   |   |   |   |  |
