# Supplementary material for: Delivery of long-term-injectable agents for TB by lay carers: pragmatic randomised trial
Source: PubMed Central journal article supplement (PMC6929921; doi:10.1136/thoraxjnl-2018-212675), 2019-11-01
Supplement: thoraxjnl-2018-212675supp002.pdf [file thoraxjnl-2018-212675supp002.pdf]

**Supplementary file 2. Home monitoring form**



| Month | 1 | 2 | 3 | 4 | 5 | 6 | 7 | 8 | 9 | 10 | 11 | 12 | 13 | 14 | 15 | 16 | 17 | 18 | 19 | 20 | 21 | 22 | 23 | 24 | 25 | 26 | 27 | 28 | 29 | 30 | 31 |  |  |  |
|-------|---|---|---|---|---|---|---|---|---|----|----|----|----|----|----|----|----|----|----|----|----|----|----|----|----|----|----|----|----|----|----|--|--|--|
|       |   |   |   |   |   |   |   |   |   |    |    |    |    |    |    |    |    |    |    |    |    |    |    |    |    |    |    |    |    |    |    |  |  |  |
|       |   |   |   |   |   |   |   |   |   |    |    |    |    |    |    |    |    |    |    |    |    |    |    |    |    |    |    |    |    |    |    |  |  |  |
|       |   |   |   |   |   |   |   |   |   |    |    |    |    |    |    |    |    |    |    |    |    |    |    |    |    |    |    |    |    |    |    |  |  |  |

  

| Ulendo | Tsiku | Date | Nthawi |
|--------|-------|------|--------|
| 1      |       |      |        |
| 2      |       |      |        |
| 3      |       |      |        |
| 4      |       |      |        |

  

**Ngati pangakhale zovuta:**

Lolembe kufikira Lachisanu 8 koloko mpaka 5 koloko, phone:  
 K[REDACTED]  
 Nthawi ina ili yonse:  
 Pitani ku Ngozi kapena ku Wodi 3A ku chipatala cha  
 Queen Elizabeth central Hospital.
