# Supplementary material for: Delivery of long-term-injectable agents for TB by lay carers: pragmatic randomised trial
Source: PubMed Central journal article supplement (PMC6929921; doi:10.1136/thoraxjnl-2018-212675), 2019-11-01
Supplement: thoraxjnl-2018-212675supp003.pdf [file thoraxjnl-2018-212675supp003.pdf]

---

**Supplementary file 3. Adverse Event definitions**

---

|                                                |                                                                                                                                                                                                                                                                                                                                                                                                                                                                                                                                     |
|------------------------------------------------|-------------------------------------------------------------------------------------------------------------------------------------------------------------------------------------------------------------------------------------------------------------------------------------------------------------------------------------------------------------------------------------------------------------------------------------------------------------------------------------------------------------------------------------|
| <b>Adverse event (AE)</b>                      | Any untoward medical occurrence in a study participant                                                                                                                                                                                                                                                                                                                                                                                                                                                                              |
| Clinical event                                 | Any illness or clinical injury, including possible infection at an injection site, possible sciatic nerve injury, possible renal impairment, possible hearing loss, prescription of any new medication                                                                                                                                                                                                                                                                                                                              |
| PEP event                                      | Any possible blood-borne infection exposure occurring in relation to administration of streptomycin, including needle-stick injuries, which may or may not require post exposure prophylaxis (PEP) for HIV                                                                                                                                                                                                                                                                                                                          |
| Adherence event                                | Any situation in which the guardian does not administer daily streptomycin injections, and includes missed doses identified by self-report or vial count at routine review, or the guardian being unavailable to give the dose for any other reason (e.g. travelling away)                                                                                                                                                                                                                                                          |
| Default event                                  | Any missed routine follow-up visit                                                                                                                                                                                                                                                                                                                                                                                                                                                                                                  |
| <b>Serious Adverse Event (SAE)</b>             | Any adverse event that:<br>i. Results in death<br>ii. Is life-threatening<br>iii. Requires hospitalisation or prolongation of existing hospitalisation (including readmission because of any clinical, adherence, safety or PEP event)<br>iv. Results in persistent or significant disability or incapacity (including sciatic nerve injury or ototoxicity)<br>v. Results in a patient being lost to follow up<br>vi. Results in any caregiver requiring Post Exposure Prophylaxis following possible exposure to blood-borne virus |
| <b>Unexpected Serious Adverse Event (USAE)</b> | Any SAE that, for any reason, is deemed to be unexpected and requires expedited review                                                                                                                                                                                                                                                                                                                                                                                                                                              |

---
