# Supplementary material for: Delivery of long-term-injectable agents for TB by lay carers: pragmatic randomised trial
Source: PubMed Central journal article supplement (PMC6929921; doi:10.1136/thoraxjnl-2018-212675), 2019-11-01
Supplement: thoraxjnl-2018-212675supp006.pdf [file thoraxjnl-2018-212675supp006.pdf]

## Supplementary file 6. Provider costs

### a) Home-based management

|                                  | Mean costs (95% CI)<br>2014 US dollars<br>n=32 |
|----------------------------------|------------------------------------------------|
| <b>Training guardians</b>        |                                                |
| Days of admission                | 301.0 (233.0-369.1)                            |
| Nurse time                       | 7.5 (5.8-9.3)                                  |
| Gloves                           | 1.2 (0.8-1.5)                                  |
| Syringes                         | 0.4 (0.3-0.5)                                  |
| Needles                          | 0.8 (0.7-1.0)                                  |
| Water for injection              | 0.7 (0.6-0.9)                                  |
| Alcohol swabs                    | 0.2 (0.2-0.3)                                  |
| Training materials               | 1.2                                            |
| Overhead costs                   | 1.3 (1.0-1.6)                                  |
| <b>TOTAL TRAINING COSTS</b>      | <b>314.3 (245-383.0)</b>                       |
| <b>Routine follow up</b>         |                                                |
| HSA time                         | 9.7 (7.8-11.6)                                 |
| HSA transport                    | 7.4 (5.4-9.5)                                  |
| Gloves                           | 5.6 (5.0-6.2)                                  |
| Syringes                         | 2.7 (2.4-3.0)                                  |
| Needles                          | 3.1 (2.8-3.4)                                  |
| Water for injection              | 4.6 (4.2-5.1)                                  |
| Alcohol swabs                    | 1.2 (1.0-1.3)                                  |
| Sharps boxes                     | 4.6 (4.3-5.0)                                  |
| Overhead costs                   | 4.9 (3.9-5.9)                                  |
| <b>TOTAL FOLLOW UP COSTS</b>     | <b>43.9 (38.0-49.7)</b>                        |
| <b>Adverse events</b>            |                                                |
| HSA time                         | 0.1 (0.0-0.2)                                  |
| Nurse time                       | 0.01 (0.0-0.1)                                 |
| Junior clinician time            | 0.1 (-0.1-0.4)                                 |
| Senior doctor time               | 0.5 (0.1-1.0)                                  |
| Drugs                            | 3.7 (-2.2-10.0)                                |
| Investigations & procedures      | 6.8 (-1.5-15.1)                                |
| Ward stay for readmission        | 22.2 (0.0-56.1)                                |
| Airtime                          | 0.3 (0.0-0.6)                                  |
| Overhead costs                   | 0.1 (0.0-0.2)                                  |
| <b>TOTAL ADVERSE EVENT COSTS</b> | <b>34.0 (0.0-75.7)</b>                         |
| <b>TB drugs</b>                  | <b>85.4 (80.9-89.8)</b>                        |
| <b>ART</b>                       | <b>20.5 (19.4-21.6)</b>                        |
| <b>TOTAL PROVIDER COSTS</b>      | <b>498.0 (425.6-570.4)</b>                     |

### b) Hospital-based management

|                             | Mean costs (95% CI)<br>2014 US dollars<br>n=33 |
|-----------------------------|------------------------------------------------|
| Investigations & procedures | 109.2 (68.5-149.9)                             |
| Drugs                       | 114.0 (110.1-117.9)                            |
| Ward stay                   | 895.6 (859.1-932.1)                            |
| <b>TOTAL PROVIDER COSTS</b> | <b>1100.3 (1040.8-1159.8)</b>                  |
