# Supplementary material for: Delivery of long-term-injectable agents for TB by lay carers: pragmatic randomised trial
Source: PubMed Central journal article supplement (PMC6929921; doi:10.1136/thoraxjnl-2018-212675), 2019-11-01
Supplement: thoraxjnl-2018-212675supp007.pdf [file thoraxjnl-2018-212675supp007.pdf]

**Additional file 7a. Risk of incurring costs of  $\geq 10\%$  of household income according to study arm**

|                  | <b>Total population</b> | <b>Hospital-based management</b> | <b>Home-based management</b> | <b>Risk Ratio</b> |
|------------------|-------------------------|----------------------------------|------------------------------|-------------------|
| All participants | 109/180 (60.6)          | 79/92 (85.9)                     | 30/88 (34.1)                 | 0.40 (0.29-0.54)  |
| Wealth quartile  |                         |                                  |                              |                   |
| First            | 21/41 (51.2)            | 17/19 (89.5)                     | 4/22 (18.2)                  | 0.20 (0.08-0.50)  |
| Second           | 31/45 (68.9)            | 22/26 (84.6)                     | 9/20 (45.0)                  | 0.53 (0.32-0.89)  |
| Third            | 28/46 (60.9)            | 20/25 (80.0)                     | 8/21 (38.1)                  | 0.48 (0.27-0.85)  |
| Fourth           | 27/44 (64.3)            | 20/23 (87.0)                     | 7/21 (33.3)                  | 0.38 (0.21-0.72)  |
| Gender           |                         |                                  |                              |                   |
| Male             | 72/127 (56.7)           | 50/60 (83.3)                     | 22/67 (32.8)                 | 0.39 (0.27-0.57)  |
| Female           | 37/53 (69.8)            | 29/32 (90.6)                     | 8/21 (38.1)                  | 0.42 (0.24-0.73)  |
| HIV status       |                         |                                  |                              |                   |
| Negative         | 13/35 (37.1)            | 9/12 (75.0)                      | 4/23 (17.4)                  | 0.23 (0.09-0.60)  |
| Positive         | 96/145 (66.2)           | 70/80 (87.5)                     | 26/65 (40.0)                 | 0.46 (0.34-0.62)  |

**Additional file 7b. Risk of incurring costs of  $\geq 20\%$  household income according to study arm**

|                  | <b>Total study population</b> | <b>Hospital-based management</b> | <b>Home-based management</b> | <b>Risk Ratio</b> |
|------------------|-------------------------------|----------------------------------|------------------------------|-------------------|
| All participants | 67/180 (37.2)                 | 58/92 (62.0)                     | 9/88 (11.4)                  | 0.16 (0.08-0.41)  |
| Wealth quartile  |                               |                                  |                              |                   |
| First            | 13/41 (31.2)                  | 13/19 (68.4)                     | 0/22 (0.0)                   | NA                |
| Second           | 17/45 (37.8)                  | 14/26 (53.9)                     | 2/20 (10.0)                  | 0.17 (0.04-0.64)  |
| Third            | 22/46 (47.8)                  | 16/25 (64.4)                     | 6/21 (28.6)                  | 0.45 (0.20-0.93)  |
| Fourth           | 15/44 (34.1)                  | 14/23 (60.1)                     | 1/21 (4.8)                   | 0.07 (0.01-0.54)  |
| Gender           |                               |                                  |                              |                   |
| Male             | 42/127 (33.1)                 | 36/60 (60.0)                     | 6/67 (9.0)                   | 0.15 (0.07-0.33)  |
| Female           | 25/53 (47.2)                  | 22/32 (68.8)                     | 3/21 (14.3)                  | 0.21 (0.07-0.61)  |
| HIV status       |                               |                                  |                              |                   |
| Negative         | 7/35 (20.0)                   | 7/12 (58.3)                      | 0/23 (0.0)                   | NA                |
| Positive         | 60/145 (41.4)                 | 51/80 (63.8)                     | 9/65 (13.9)                  | 0.22 (0.12-0.41)  |
